# Supplementary material for: Revisiting and improving the preparation of silicon-based electrodes for lithium-ion batteries: ball milling impact on poly(acrylic acid) polymer binders
Source: Royal Society of Chemistry journal article supplement (doi:10.1039/c8qm00660a), 2019-01-01
Supplement: c8qm00660a1.pdf [file c8qm00660a1.pdf]

a)

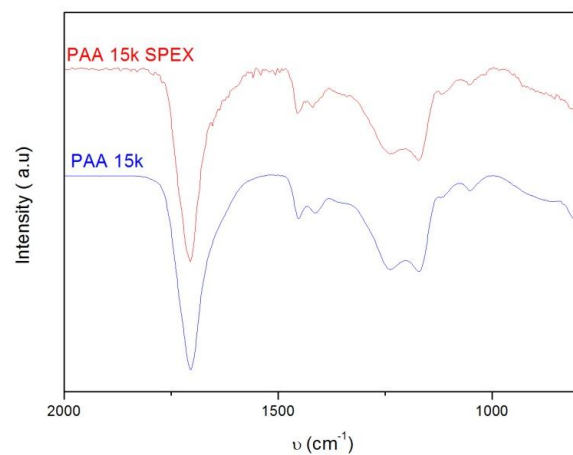

b)

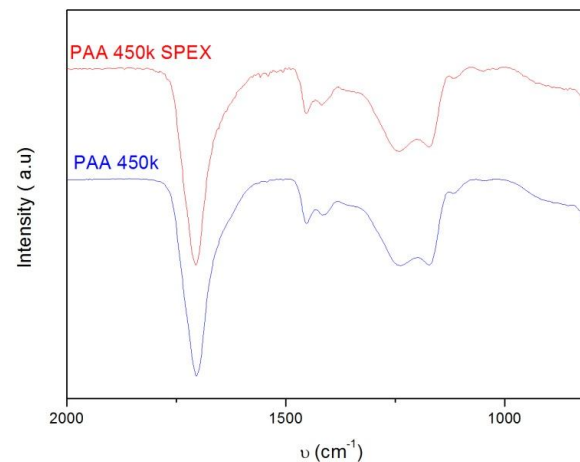

c)

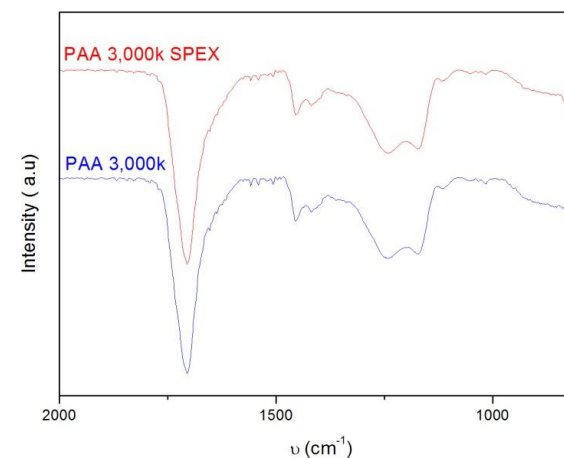

**Figure S1:** IRTF spectra (ATR) of pristine (blue line) and 30 mn SPEX ball milled (red line) PAA 15k (a), PAA 450k (b) and PAA 3000k (c)

| Formulation 1 | Porosity % | Loading<br>(mg.cm <sup>-2</sup> ) |
|---------------|------------|-----------------------------------|
| PAA 15        | 65         | 1.19                              |
| PAA 450       | 60         | 1.19                              |
| PAA 3000      | 60         | 1.05                              |

| Formulation 2 | Porosity % | Loading<br>(mg.cm <sup>-2</sup> ) |
|---------------|------------|-----------------------------------|
| PAA 450       | 70         | 1.47                              |

| Formulation 3 | Porosity % | Loading<br>(mg.cm <sup>-2</sup> ) |
|---------------|------------|-----------------------------------|
| PAA 15        | 65         | 1.12                              |
| PAA 450       | 70         | 1.12                              |
| PAA 3000      | 70         | 1.26                              |

**Table S1:** Porosity (%) and active mass loading (mg.cm<sup>-2</sup>) of 15k, 450k and 3000k PAA based electrodes using formulation 1 (a), formulation 2 (b) and formulation 3 (c)
